# Supplementary material
Source: PubMed Central journal article supplement (PMC4149890)
Supplement: NIHMS608829-supplement-supplement_1.pdf [file NIHMS608829-supplement-supplement_1.pdf]

## LEGENDS TO ONLINE REPOSITORY FIGURES

**Figure E1. CD3<sup>+</sup> T cells are unnecessary for the type 2 immune response to IL-25.**

Intact PBMCs (Intact) or PBMCs from which CD3<sup>+</sup> cells had been magnetically depleted (CD3-depleted) were cultured with medium, IL-25 (10 ng/ml) alone, IL-2 (20 U/ml) alone, or IL-2 plus IL-25 for 5 days. IL-5 and IL-13 levels in cell-free supernatants were determined using ELISA. Data are the mean  $\pm$  SEM of 2-5 independent experiments.

**Figure E2. Blood ILC2s express the IL-33 receptor ST2 and respond to IL-33 in vitro.**

(A) Gating strategy to identify ILC2s in PBMCs. In the histogram, anti-human ST2 staining (black line) and isotype control antibody staining (filled grey) are shown. (B) PBMCs were cultured with medium alone or with IL-33 (10 ng/ml) plus IL-2 (20 U/ml) for 4 days. Brefeldin A was added for the last 12 hours. (Top panels) Gating strategy for ILC2 identification. (Bottom panels) Intracellular IL-5 staining in ILC2s cultured with medium alone (left panel, red line) or with IL-33 plus IL-2 (right panel, blue line) is shown. Grey filled histograms depict isotype control staining for each culture condition.

**Figure E3. Blood ILC2s from healthy control subjects and allergic asthma subjects express comparable levels of ST2.**

PBMCs from the two subject groups were gated as described in Figure E2, and ST2 expression was analyzed. In the histogram, anti-human ST2 staining is indicated by the blue line, and isotype control staining is depicted by the filled grey area. Representative data from 3 healthy control subjects and 3 allergic

asthma subjects are shown.

ACCEPTED MANUSCRIPT

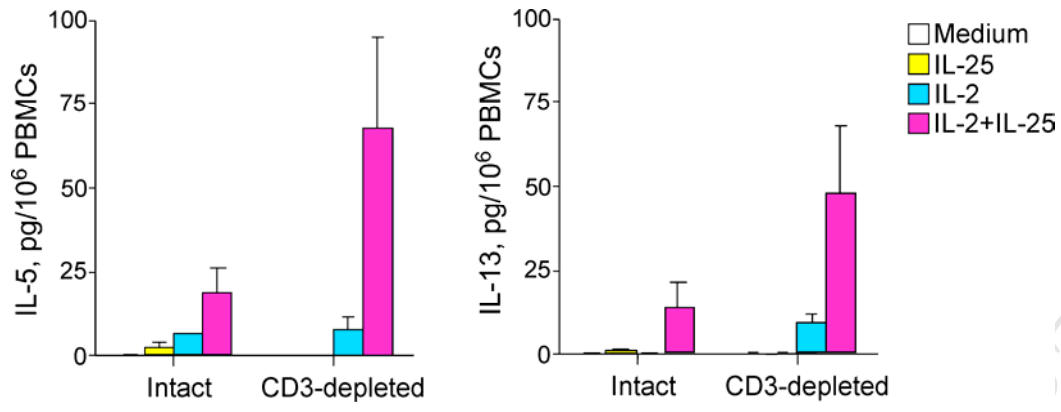

Figure E1

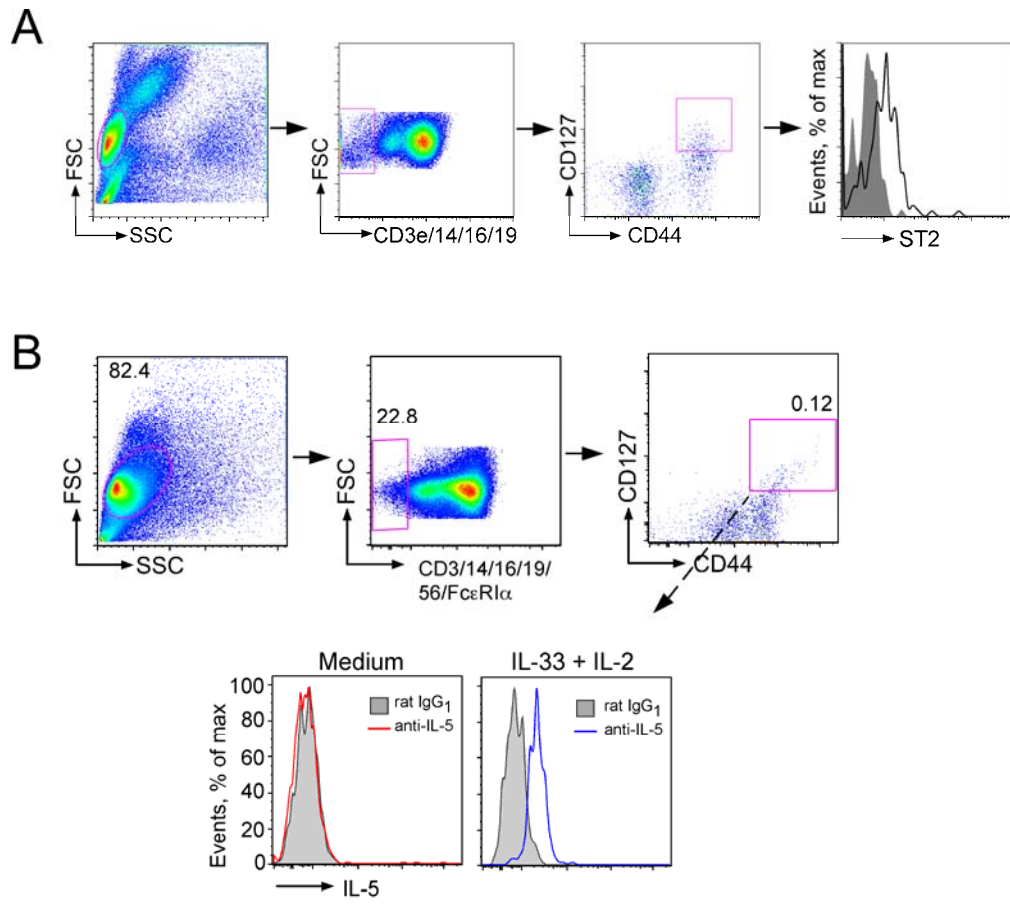

Figure E2

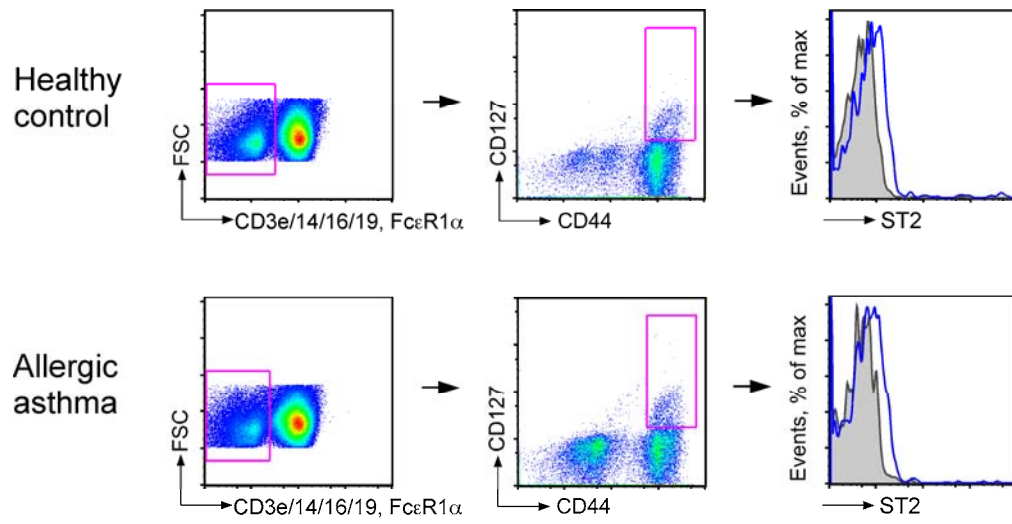

Figure E3
